# Supplementary material
Source: PubMed Central journal article supplement (PMC2795505)
Supplement: 0908258106_0908258106SI.pdf [file 0908258106_0908258106SI.pdf]

# Supporting Information

Chen et al. 10.1073/pnas.0908258106

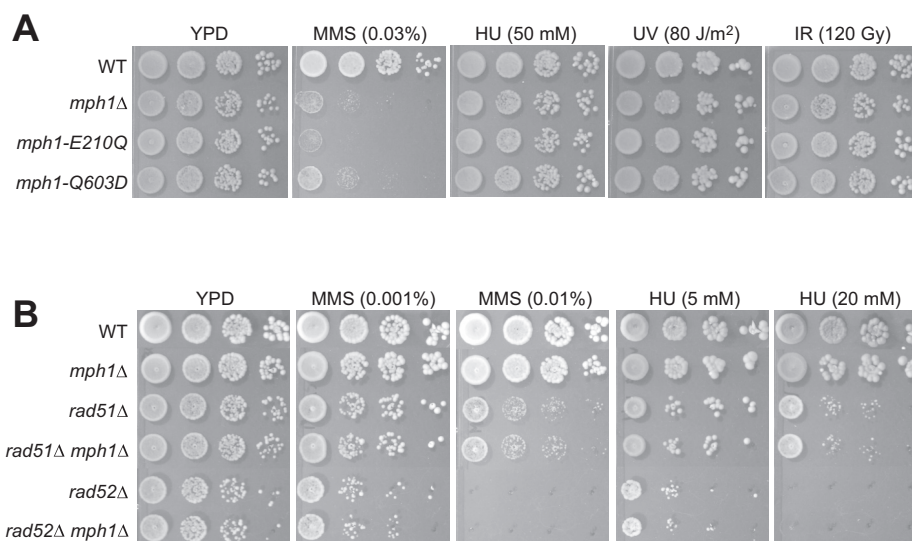

Fig. S1. Sensitivity to DNA damage caused by *mph1* mutations in WT, *rad51*Δ, and *rad52*Δ backgrounds. Experiments were carried out as described in Fig. 2A.

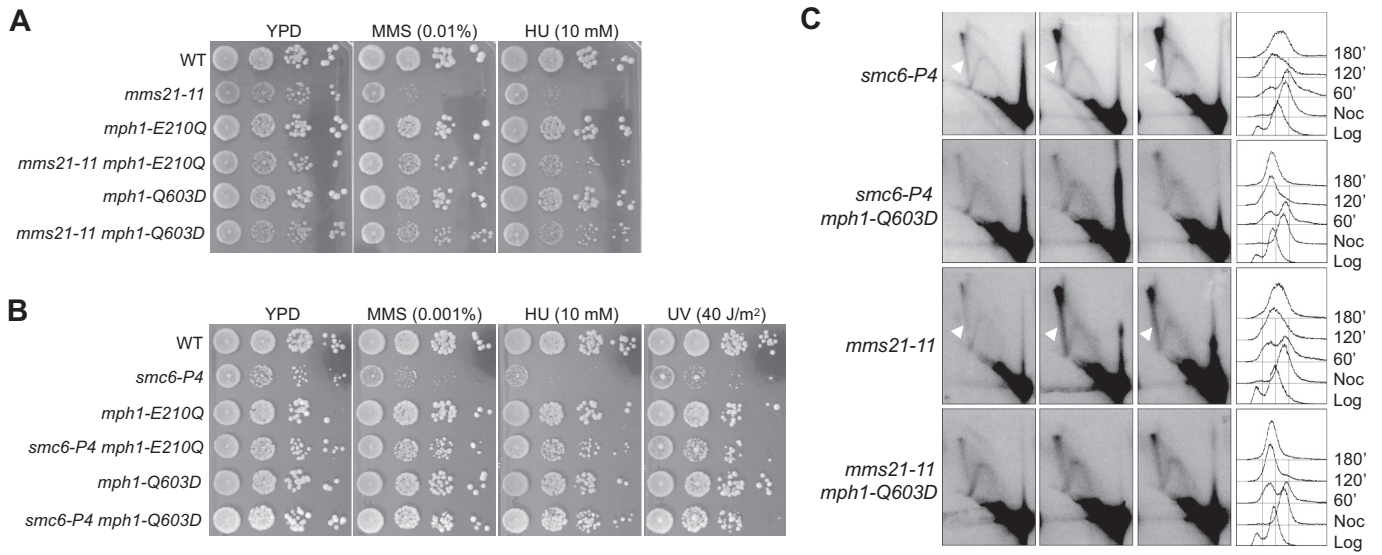

**Fig. S2.** Helicase mutations of *mph1* suppress the sensitivity to DNA damage and the accumulation of recombination intermediates in *mms21-11* and *smc6-P4* cells. (A and B) *mph1-E210Q* and *-Q603D* suppress the sensitivity to DNA damage of *mms21-11* cells (A) and *smc6-P4* cells (B). Experiments were carried out as described in Fig. 2A. (C) *mph1-Q603D* suppresses the accumulation of X-shaped recombination intermediates in *mms21-11* and *smc6-P4* cells. Experiments were carried out as described in Fig. 4.

**Table S1. The levels of Mph1, Rad52, and Pol30 foci in WT cells**

| % Cells containing foci of these proteins | Normal growth | MMS treatment* |
|-------------------------------------------|---------------|----------------|
| Mph1                                      | 6% (50/789)** | 13% (72/578)** |
| Rad52                                     | 33% (264/789) | 44% (254/578)  |
| Pol30                                     | 19% (152/789) | 32% (183/578)  |
| % Mph1 foci co-localized with             |               |                |
| Rad52 foci                                | 76% (38/50)   | 81% (58/72)    |
| Pol30 foci                                | 30% (15/50)   | 32% (23/72)    |
| Both Rad52 and Pol30 foci                 | 22% (11/50)   | 21% (15/72)    |

\*Cells were treated with 0.03% MMS for 2 h.

\*\* $P \leq 0.025\%$ .

**Table S2. Strains and plasmids used in this study**

| Name      | Genotype                                                                                               | Sources        |
|-----------|--------------------------------------------------------------------------------------------------------|----------------|
| W1588-4C  | <i>MATa ade2-1 can1-100 his3-11,15 leu2-3,112 trp1-1 ura3-1 RAD5+</i>                                  | R. Rothstein   |
| X2240-8C  | <i>MATa smc6-56-13myc::HIS3 rad51Δ ::LEU2</i>                                                          | This study     |
| T294-11B  | <i>MATa SMC5-13Myc::HIS3</i>                                                                           | Lab collection |
| X1996-12B | <i>MATα SMC5-13Myc::HIS3 MPH1-3Flag::HIS3</i>                                                          | This study     |
| X1546-12B | <i>MATa MPH1-13myc::HIS3</i>                                                                           | This study     |
| T538-2    | <i>MATa MPH1-3Flag::HIS3</i>                                                                           | This study     |
| T497-1    | <i>MATa MPH1-YFP::HIS3</i>                                                                             | This study     |
| 1483-2Ca  | <i>MATa mph1Δ::KAN</i>                                                                                 | H. Klein       |
| W3111-1C  | <i>MATa rad51Δ::LEU2</i>                                                                               | R. Rothstein   |
| X1958-1C  | <i>MATα mph1Δ::KAN rad51Δ::LEU2</i>                                                                    | This study     |
| T80-14    | <i>MATα mms21-11::URA3</i>                                                                             | (1)            |
| X2007-3D  | <i>MATa mph1Δ::KAN mms21-11::URA3</i>                                                                  | This study     |
| T382-P4   | <i>MATa smc6-P4-13myc::HIS3</i>                                                                        | This study     |
| X1787-4A  | <i>MATa mph1Δ::Kan smc6-P4-13myc::HIS3</i>                                                             | This study     |
| X2020-10B | <i>MATα smc6-P4-13myc::HIS3 rad51Δ::LEU2</i>                                                           | This study     |
| X2123-2A  | <i>MATa smc6-56-13myc::HIS3</i>                                                                        | This study     |
| X2123-3C  | <i>MATa mph1Δ::KAN smc6-56-13myc::HIS3</i>                                                             | This study     |
| W1958-4D  | <i>MATα sgs1Δ::HIS3</i>                                                                                | R. Rothstein   |
| X1907-2D  | <i>MATα mph1Δ::KAN sgs1Δ::HIS3</i>                                                                     | This study     |
| X2489-9C  | <i>MATa MPH1-YFP::HIS3 RAD52-RFP CFP-POL30</i>                                                         | This study     |
| X1991-1A  | <i>MATa lys2Δ his3-11::pCUP1-GFP12-lac12::HIS trp1-1::LacO::TRP1 MCD1:3XHA:URA3:3XHA</i>               | This study     |
| X2359-7A  | <i>MATa lys2Δ his3-11::pCUP1-GFP12-lac12::HIS trp1-1::LacO::TRP1 mph1Δ::KAN</i>                        | This study     |
| X2006-31C | <i>MATa lys2Δ his3-11::pCUP1-GFP12-lac12::HIS smc6-56-13myc-HIS3MX6 trp1-1::LacO::TRP1</i>             | This study     |
| X2358-14A | <i>MATa lys2Δ his3-11::pCUP1-GFP12-lac12::HIS3 smc6-56-13myc-HIS3MX6 trp1-1::LacO::TRP1 mph1Δ::KAN</i> | This study     |
| pXZ 216   | <i>pOAD-MPH1</i>                                                                                       | This study     |
| pXZ 194   | <i>pOBD-SMC5</i>                                                                                       | This study     |
| pXZ 198   | <i>pOBD-NSE1</i>                                                                                       | This study     |
| pXZ 55    | <i>pOBD-MMS21</i>                                                                                      | This study     |
| pXZ 191   | <i>pOBD-NSE3</i>                                                                                       | This study     |
| pXZ 196   | <i>pOBD-NSE4</i>                                                                                       | This study     |
| pXZ 199   | <i>pOBD-NSE5</i>                                                                                       | This study     |
| pXZ 193   | <i>pOBD-NSE6</i>                                                                                       | This study     |
| pXZ 195   | <i>pOBD-SMC6</i>                                                                                       | This study     |
| P134      | <i>pGAL-MPH1</i>                                                                                       | OpenBiosystem  |
| X700-10D  | <i>MATa SMC6-YFP::KAN</i>                                                                              | This study     |
| T597-1    | <i>MATα mph1-Q603D-YFP::HIS5</i>                                                                       | This study     |
| T617      | <i>MATα mph1-E210Q-YFP::HIS5</i>                                                                       | This study     |
| X2183-1B  | <i>MATa mms21-11::URA3 mph1-Q603D-YFP::HIS5</i>                                                        | This study     |
| X2170-4A  | <i>MATα mms21-11::URA3 mph1-E210Q-YFP::HIS5</i>                                                        | This study     |
| X2176-1C  | <i>MATa smc6-P4-13myc::KAN mph1-Q603D-YFP::HIS5</i>                                                    | This study     |
| X2171-14B | <i>MATa smc6-P4-13myc::KAN mph1-E210Q-YFP::HIS5</i>                                                    | This study     |
| X2217-14C | <i>MATa smc6-56-13myc::KAN mph1-Q603D-YFP::HIS5</i>                                                    | This study     |
| X2212-12A | <i>MATa smc6-56-13myc::KAN mph1-E210Q-YFP::HIS5</i>                                                    | This study     |
| X2233-15A | <i>MATa SMC5-13myc::HIS3 mph1-Q603D-YFP::HIS5</i>                                                      | This study     |
| T295-3C   | <i>MATa SMC6-13myc::HIS3</i>                                                                           | This study     |
| X2452-7B  | <i>MATα SMC6-13myc::HIS3 MPH1-3Flag::HIS3</i>                                                          | This study     |
| T130-4B   | <i>MATα NSE6-13myc::KAN</i>                                                                            | This study     |
| X2453-16A | <i>MATα NSE6-13myc::KAN MPH1-3Flag::HIS3</i>                                                           | This study     |
| X707-8B   | <i>MATa srs2Δ::HIS3</i>                                                                                | This study     |
| X1804-20D | <i>MATα srs2Δ::HIS3 mph1Δ::KAN</i>                                                                     | This study     |
| X795-4B   | <i>MATα srs2Δ::TRP1 mms21-11-3HA::KAN</i>                                                              | This study     |
| X801      | <i>MATα sgs1Δ::HIS3/+ mms21-11HA::KAN/+ rad51Δ::LEU2/+</i>                                             | This study     |
| pXZ115    | <i>pET28a-Smc5</i>                                                                                     | (1)            |
| Mph10     | <i>pGEX4T3-Mph1</i>                                                                                    | This study     |
| X532      | <i>MATα mms21-11::URA3/+ SMC6-YFP/+ ade3Δ</i>                                                          | This study     |
| T733      | <i>MATα mms21Δ::KAN/+ mph1Δ::URA3/+</i>                                                                | This study     |
| T732-2    | <i>MATα smc6Δ::KAN/+ mph1Δ::URA3/+</i>                                                                 | This study     |

Strains in this study are derivatives of W1588-4C, a *RAD5* derivative of W303 (*MATa ade2-1 can1-100 ura3-1 his3-11,15 leu2-3,112 trp1-1 rad5-535*) (2). When applicable, a single representative of each genotype is listed. Strains containing WT proteins fused with various tags exhibit normal cell growth or resistance to DNA damaging agents, suggesting that the fusion constructs are fully functional.

1. Zhao X, Blobel G (2005) A SUMO ligase is part of a nuclear multiprotein complex that affects DNA repair and chromosomal organization. *Proc Natl Acad Sci USA* 102:4777-4782.
2. Thomas BJ, Rothstein R (1989) Elevated recombination rates in transcriptionally active DNA. *Cell* 56:619-630.
